# Supplementary material for: Utilizing the ABC Transporter for Growth Factor Production by fleQ Deletion Mutant of Pseudomonas fluorescens
Source: MDPI journal article supplement (doi:10.3390/biomedicines9060679), 2021-06-16
Supplement: s1 [file s1]

# Utilizing the ABC transporter for growth factor Production by *fleQ* Deletion Mutant of *Pseudomonas fluorescens*

Benedict Uy Fabia<sup>1</sup>, Joshua Bingwa<sup>1</sup>, Jiyeon Park<sup>2</sup>, Nguyen Mihn Hieu<sup>1</sup>, and Jung Hoon Ahn<sup>1,2,\*</sup>

**Supplementary material. Full sequences of the target proteins, in FASTA formats**

**> IGF1**

MGPETLCGAELVDALQFVCGDRGFYFNKPTGYGSSRRAPQTGIVDECCFRSCDLRRLEMYCAPLKPAKSA

**> IGFII**

MAYRPSETLCGGELVDTLQFVCGDRGFYFSRPASRVSRRSRGIVEECCFRSCDLALLETYCATPAKSE

**>  $\beta$ NGF**

MSSSHPIFHRGEFSVCDSSVSVWVGDKTTATDIKGKEVMVLGEVNINNSVFKQYFFETKCRDPNPVDSGCRGIDSKHW  
NSYCTTTHTFVKALTMGKQAARFIRIDTACVCLSRKAVRRA

**> FGF1**

MFNLPPGNYKKPKLLYCSNGGHFLRILPDGTVDGTRDRSDQHIQLQLSAESVGEVYIKSTETGQYLAMDTDGLLYGS  
QTPNEECLFLERLEENHYNTYISKKHAENWFVGLKKNKGCKRGPRTHYGQKAILFLPLPVSSD

**> TGF $\beta$**

MSRALDTNYCFSSTEKNCCVRQLYIDFRKDLGWKWIHEPKGYHANFCLGPCPYIWSLDTQYSKVLALYNQHNP  
GA SAAPCCVPQALEPLPIVYVGRKPKVEQLSNMIVRSCKCS

**> TNF $\beta$**

MLPGVGLTPSAAQTARQHPKMHLAHSTLKPAAHLLIGDPSKQNSLLWRANTDRAFLQDGFSLNNSLLVPTSGIYFV  
YSQVVFSGKAYSPKATSSPLYLAHEVQLFSSQYPFHVPLLSSQKMVYPGLQEPWLHSMYHGAAFLTQGDQLSTHT  
DGIPHLVLSPSTVFFGAFAL

**> Negatively supercharged IGF1 (IGF1(-))**

MGPETLCGAELVDALQFVCGDRGFYFNEPTGYGSSSQRAPQTGIVDECCFRSCDLQQLEMYCAPLEPAKSA

**> Negatively supercharged IGFII (IGFII(-))**

MAYRPSETLCGGELVDTLQFVCGDRGFYFSEPASQVSQSRGIVEECCFRSCDLALLETYCATPAKSE

**> Negatively supercharged  $\beta$ NGF ( $\beta$ NGF(-))**

MSSSHPIFHRGEFSVCDSSVSVWVGDKTTATDIKGKEVMVLGEVNINNSVFKQYFFETKCRDPNPVDSGCRGIDSKHW  
NSYCTTTHTFVKALTMGGEQAADFIDIDTACVCLSEEAVEEA

**> Negatively supercharged FGFI (FGF1(-))**

MFNLPPGNYQQPKLLYCSNGGHFLRILPDGTVDGTRDDSDQHQLQLSAESVGEVYIKSTETGQYLAMDTDGLLYGS  
QTPNEECLFLERLEENHYNTYISQEHAEQNWVGLKQNGSCKDGPRTHYGQKAILFLPLPVSSD

**> Negatively supercharged TGFβ (TGFβ(-))**

MSRALDTNYCFSSTEENCCVRQLYIDFREDLGWKWIHEPKGYHANFCLGPCPYIWSLDTQYSKVLALYNQHNP GAS  
AAPCCVPQALEPLPIVYYYVGRDPKVEQLSNMIVDSCKCS

**> Negatively supercharged TNFβ (TNFβ(-))**

MLPGVGLTPSAAQTAQQHPQMHLAHSTLKPA AHLIGDPSTQNSLLWRANTDRAFLQDGFSLNNSLLVPTSGIYFV  
YSQVVFSGEAYSPEATSSPLYLAHEVQLFSSQYPFHVPLLSSQKMVYPGLQEPWLHSMYHGAA FQLTQGDQLSTHTD  
GIPHLVLS PSTVFFGAFAL
